# Supplementary material
Source: MDPI journal article supplement (https://www.mdpi.com/2071-1050/11/19/5215)
Supplement: s1 [file s1]

## Appendix: measures used in the survey

| Variable           | Codes | Items                                                                                                                                                                                                                                                                                                                                                                                                                                                                                                                                                                                                                                                                                                                                                                                                                                                                                                                                                                                                                                                                                                                                                                                                                                                                     | Source                    | 1 | 2 | 3 | 4 | 5 |
|--------------------|-------|---------------------------------------------------------------------------------------------------------------------------------------------------------------------------------------------------------------------------------------------------------------------------------------------------------------------------------------------------------------------------------------------------------------------------------------------------------------------------------------------------------------------------------------------------------------------------------------------------------------------------------------------------------------------------------------------------------------------------------------------------------------------------------------------------------------------------------------------------------------------------------------------------------------------------------------------------------------------------------------------------------------------------------------------------------------------------------------------------------------------------------------------------------------------------------------------------------------------------------------------------------------------------|---------------------------|---|---|---|---|---|
| <b>Knowledge</b>   | KL    | <i>I have enough knowledge to professionally procure sustainably</i>                                                                                                                                                                                                                                                                                                                                                                                                                                                                                                                                                                                                                                                                                                                                                                                                                                                                                                                                                                                                                                                                                                                                                                                                      | Grandia, 2015             |   |   |   |   |   |
| <b>Skills</b>      | SK    | <i>I have enough skills to professionally procure sustainably</i>                                                                                                                                                                                                                                                                                                                                                                                                                                                                                                                                                                                                                                                                                                                                                                                                                                                                                                                                                                                                                                                                                                                                                                                                         | Grandia, 2015             |   |   |   |   |   |
| <b>Motivation</b>  | ACC   | <ul style="list-style-type: none"> <li><i>I believe in the value of the implementation of sustainable procurement.</i></li> <li><i>The implementation of sustainable procurement is a good strategy for this organisation.</i></li> <li><i>I think that management is making a mistake by introducing the implementation of sustainable procurement (R).</i></li> <li><i>The implementation of sustainable procurement makes an important purpose.</i></li> <li><i>Things would be better without the implementation of sustainable procurement (R).</i></li> </ul> <i>The implementation of sustainable procurement is not necessary (R).</i>                                                                                                                                                                                                                                                                                                                                                                                                                                                                                                                                                                                                                            | Herscovitch & Meyer, 2002 |   |   |   |   |   |
| <b>Opportunity</b> | OLC   | <ul style="list-style-type: none"> <li><i>People here receive support and encouragement when presenting new ideas</i></li> <li><i>Initiative often receives a favourable response here, so people feel encouraged to generate new ideas</i></li> <li><i>People are encouraged to take risks in this organization</i></li> <li><i>People here often venture into unknown territory</i></li> <li><i>It is part of the work of all staff to collect, bring back, and report information about what is going on outside the company</i></li> <li><i>There are systems and procedures for receiving, collating and sharing information from outside the company</i></li> <li><i>People are encouraged to interact with the environment: competitors, customers, technological institutes, universities, suppliers, etc.</i></li> <li><i>Employees are encouraged to communicate</i></li> <li><i>There is a free and open communication within my work group</i></li> <li><i>There is a free and open communication within my work group</i></li> <li><i>Managers facilitate communication</i></li> <li><i>Cross-functional teamwork is a common practice here</i></li> <li><i>Managers in this organization frequently involve employees in important decisions</i></li> </ul> | Chiva et al. 2007         |   |   |   |   |   |

|                                      |      |                                                                                                                                                                                                                                                                                                            |               |
|--------------------------------------|------|------------------------------------------------------------------------------------------------------------------------------------------------------------------------------------------------------------------------------------------------------------------------------------------------------------|---------------|
|                                      |      | <ul style="list-style-type: none"> <li>• Policies are significantly influenced by the employees' views</li> </ul> <p>People feel involved in main company decisions</p>                                                                                                                                    |               |
| <b>SPP</b>                           |      | <ul style="list-style-type: none"> <li>•</li> <li>• Social return on investment</li> </ul>                                                                                                                                                                                                                 |               |
| <b>Green Public Procurement</b>      | GPP  | <ul style="list-style-type: none"> <li>• This question deals with the implementation of specific types of sustainable procurement. Please indicate per type of sustainable procurement how often you actually implement it in your procurement projects: Green public procurement</li> </ul>               | Grandia, 2015 |
| <b>Social Return On Investment</b>   | SROI | <ul style="list-style-type: none"> <li>• This question deals with the implementation of specific types of sustainable procurement. Please indicate per type of sustainable procurement how often you actually implement it in your procurement projects: social return on investment</li> </ul>            | Grandia, 2015 |
| <b>Circular Economy</b>              | CE   | <ul style="list-style-type: none"> <li>• This question deals with the implementation of specific types of sustainable procurement. Please indicate per type of sustainable procurement how often you actually implement it in your procurement projects: circular economy</li> </ul>                       | Grandia, 2015 |
| <b>Biobased Public Procurement</b>   | BPP  | <ul style="list-style-type: none"> <li>• This question deals with the implementation of specific types of sustainable procurement. Please indicate per type of sustainable procurement how often you actually implement it in your procurement projects: bio-based procurement</li> </ul>                  | Grandia, 2015 |
| <b>International Social Criteria</b> | ISC  | <ul style="list-style-type: none"> <li>• This question deals with the implementation of specific types of sustainable procurement. Please indicate per type of sustainable procurement how often you actually implement it in your procurement projects: international social criteria</li> </ul>          | Grandia, 2015 |
| <b>Innovative Public Procurement</b> | IPP  | <ul style="list-style-type: none"> <li>• This question deals with the implementation of specific types of sustainable procurement. Please indicate per type of sustainable procurement how often you actually implement it in your procurement projects: innovation-oriented public procurement</li> </ul> | Grandia, 2015 |
